# Supplementary material for: Radiation-Induced Retinopathy and Optic Neuropathy after Radiation Therapy for Brain, Head, and Neck Tumors: A Systematic Review
Source: MDPI journal article supplement (doi:10.3390/cancers15071999), 2023-03-27
Supplement: s1 [file s1]

## Supplementary material

Table S1: Table showing which radiotherapy technique and dose per fraction was used in each study.

| Study                | Year | Radiation Technique | Mean Total Dose | Dose per fraction |
|----------------------|------|---------------------|-----------------|-------------------|
| Albano L             | 2019 | MGKR                | 21              | 7-10              |
| Amoaku WMK           | 1990 | EBRT                | 47.3            | 2.4               |
| Ares C               | 2009 | PBRT                | 71.7            | 1.8-2.0           |
| Astradsson A         | 2017 | FSRT                | 54              | 1.8-2.0           |
| Astradsson A         | 2014 | FSRT                | 54              | 1.8-2.0           |
| Bhandare N           | 2005 | EBRT                | NA              | NA                |
| Brecht S             | 2019 | IMRT                | 60.5            | NA                |
| Claus F              | 2002 | EBRT                | NA              | NA                |
| Colin P              | 2005 | FSRT                | 50.4            | 1.8               |
| Demizu Y             | 2009 | CIR/PBRT            | 57.6            | 3.6               |
| Demizu Y             | 2009 | PBRT                | 65              | 2.5               |
| Duprez F             | 2012 | IMRT                | 65              | 2.0               |
| Ebara T              | 2019 | EBRT                | 60              | 2.0               |
| Elhateer H           | 2008 | FSRT                | 50.4            | 1.8               |
| Erridge S            | 2009 | EBRT                | 45              | 1.8-2.5           |
| Farzin M             | 2016 | IMRT/3D/SRS         | 54              | 1.7-17            |
| Flickinger JC        | 1989 | EBRT                | 44.17           | 1.8               |
| Flickinger JC        | 1990 | EBRT                | 60              | 1.83              |
| Fuji H               | 2011 | EBRT                | 60              | 1.8               |
| Hara W               | 2008 | EBRT +SRT           | 66              | 2.0-15            |
| Hasegawa T           | 2010 | GKRS                | 22              | NA                |
| Hasegawa T           | 2015 | SRS                 | 27              | NA                |
| Iwai Y               | 2003 | GKRS                | 11              | NA                |
| Iwai Y               | 2005 | GKRS                | 14              | NA                |
| Jang N               | 2010 | EBRT                | 70              | 1.8               |
| Jiang GL             | 1994 | EBRT                | NA              | NA                |
| Kim JO               | 2013 | FSRT                | 50.4            | 1.8               |
| Kocher M             | 2013 | FSRT                | 52.2            | 1.8               |
| Kountouri M          | 2019 | PBRT                | 74              | 1.8-2.0           |
| Kumre K              | 2015 | EBRT                | NA              | NA                |
| QT Le                | 2003 | EBRT +SRT           | 66              | 1.8/ 7-15         |
| Leavitt JA           | 2013 | GKRS                | 18              | NA                |
| Li PC                | 2019 | Proton              | 70              | 1.46-2.0          |
| Liao H               | 2014 | FSRS                | 21              | 7                 |
| Mackley Hb           | 2007 | IMRT                | 45.9            | 1.7-2.0           |
| Madani I             | 2009 | IMRT                | 70              | 2.0               |
| Marchetti M          | 2016 | MGKR                | 25              | 5.0               |
| Midena E.            | 1987 | EBRT                | 70              | N/B               |
| Midena E.            | 1987 | EBRT                | 65              | N/B               |
| Miller RC            | 1997 | SRS                 | 15              | 2.0               |
| Minniti G            | 2007 | EBRT                | NA              | 1.8               |
| Morange- Ramos I     | 1998 | GKRS                | 28              | N/B               |
| Nakamura             | 2016 | PBRT                | 70.4            | 2.2               |
| Nutting N            | 1999 | EBRT                | NA              | 1.8               |
| Ove R                | 2000 | GKRS                | 13              | NB                |
| Ozkaya A             | 2017 | EBRT                | NA              | 2.0-2.12          |
| Paek SH              | 2005 | FSRT                | 50              | 1.8               |
| Park S               | 2017 | EBRT                | NA              | 2.0               |
| Paulino A.C.         | 1989 | EBRT                | 61.7            | 1.8-2.0           |
| Pigeaud Klessens MLE | 1992 | EBRT                | 62              | N/B               |
| Pollock BE           | 2014 | SFSR                | 32              | N/B               |
| Puataweepong         | 2015 | FSRT                | 45              | 2.3               |
| Puataweepong         | 2015 | SRS                 | 16.8            | N/B               |
| Rajan B              | 1993 | EBRT                | 56              | 1.52              |
| Repka MC             | 2018 | EBRT +boost 10 Gy   | 60              | 2.0               |
| Roa WH               | 1994 | EBRT                | 68.4            | 1.8-2.0           |
| Rosenblatt E         | 2003 | EBRT                | 66.45           | 1.8-2.0           |
| Skeie BS             | 100  | GKRS                | 33.1            | NA                |
| Stafford SL          | 2003 | EBRT                | 50.2            | N/B               |
| Takeda A             | 1999 | EBRT                | NA              | 1.2-2.0           |
| Thompson             | 1983 | EBRT                | 65.9            | N/B               |
| Van Balen            | 1988 | EBRT                | 67.7            | N/B               |
| van den Bergh        | 2004 | EBRT                | NA              | 1.8-2.0           |
| van den Bergh        | 2003 | EBRT                | 49.5            | 1.8-2.1           |
| Wang                 | 2018 | HFSR                | 18.2            | NA                |
| Weber DC             | 2006 | SSPT                | 69.9            | 1.6-1.8           |
| Kothe                | 2021 | PBRT                | 70-74           | 1.8-2.0           |
| Zijing Li            | 2021 | PBRT                | NA              | N/B               |
| Yan-Ling Wu          | 2021 | IMRT                | NA              | N/B               |
| Puyao C Li           | 2019 | EBRT+PBRT           | 70              | 1.9               |
| Sukwoo Hong          | 2021 | SRS                 | 25              | N/B               |
| Rabih Hage           | 2021 | PBRT                | 52.4            | 1.8               |
| Kuen Tze Lin         | 2019 | EBRT                | 52.2            | 1.8               |
| Thingthing Zhang     | 2021 | IMRT                | 60.37           | N/B               |
| Thingthing Zhang     | 2021 | IMRT                | 57.01           | N/B               |
| Hiroaki Sufuji       | 2018 | CIR                 | NA              | N/B               |
| Gishan Ratnayak      | 2019 | SRS                 | 50.4            | 1.8               |
| Toshihiko Inoue      | 2018 | IMRT                | 52.8            | N/B               |

Abbreviations used in the table:

EBRT= external beam radiation therapy

PBRT= proton beam radiation therapy

MGKR= multisession gamma knife radiosurgery

FSRT= fractionated stereotactic radiation therapy

IMRT= intensity modulated radiation therapy

GKRS= gamma knife radiosurgery

SRS= stereotactic radiosurgery

FSRS= fractionated stereotactic radiosurgery

SFSR= single- fraction stereotactic radiosurgery

HFSR= hypofractionated stereotactic radiosurgery

SSPT= spot scanning proton therapy

CIR= carbon ion radiation therapy
